# Supplementary material for: ZIF-8/g-C3N4 photocatalysts: enhancing CO2 reduction through improved adsorption and photocatalytic performance
Source: Royal Society of Chemistry journal article supplement (doi:10.1039/d4ra02548b), 2024-01-01
Supplement: d4ra02548b1.pdf [file d4ra02548b1.pdf]

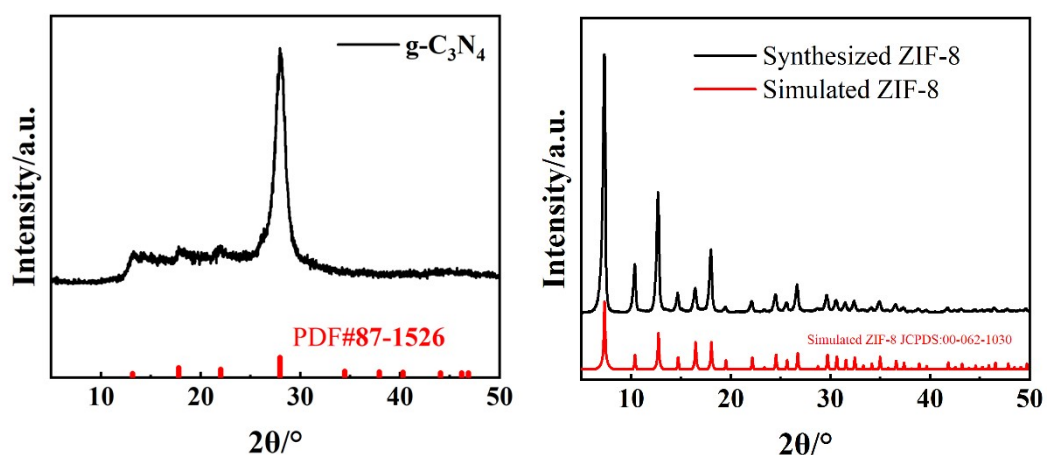

Figure S1 The standard PDF card of g-C<sub>3</sub>N<sub>4</sub> and Comparison of Simulated XRD with Synthesized XRD for ZIF-8

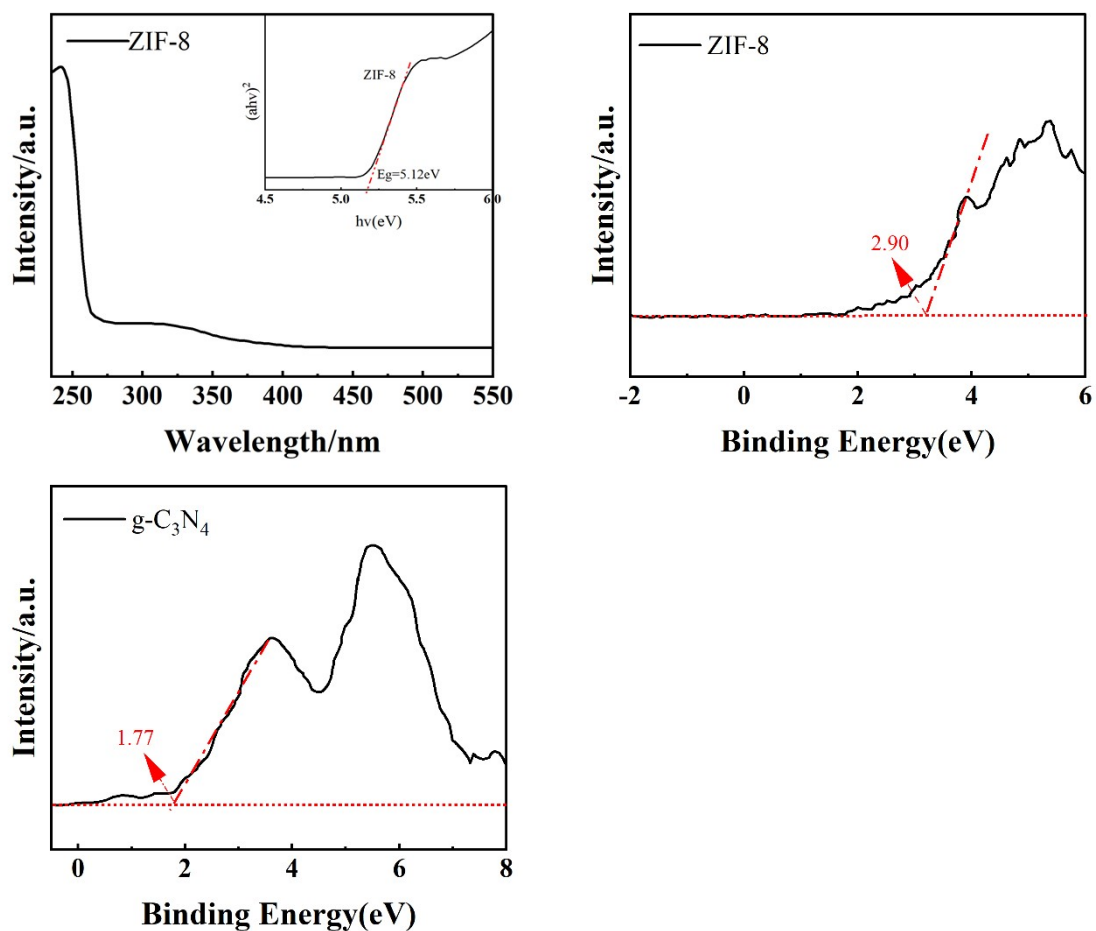

Figure S2 (a) UV-Vis and Corresponding Relationship between Optical Energy Changes of ZIF-8 (b) Valence band XPS spectra of g-C<sub>3</sub>N<sub>4</sub> and ZIF-8
